# Supplementary material for: Endometrial Cancer with and without Endometriosis: Clinicopathological Differences
Source: MDPI journal article supplement (doi:10.3390/cancers15235635), 2023-11-29
Supplement: s1 [file s1]

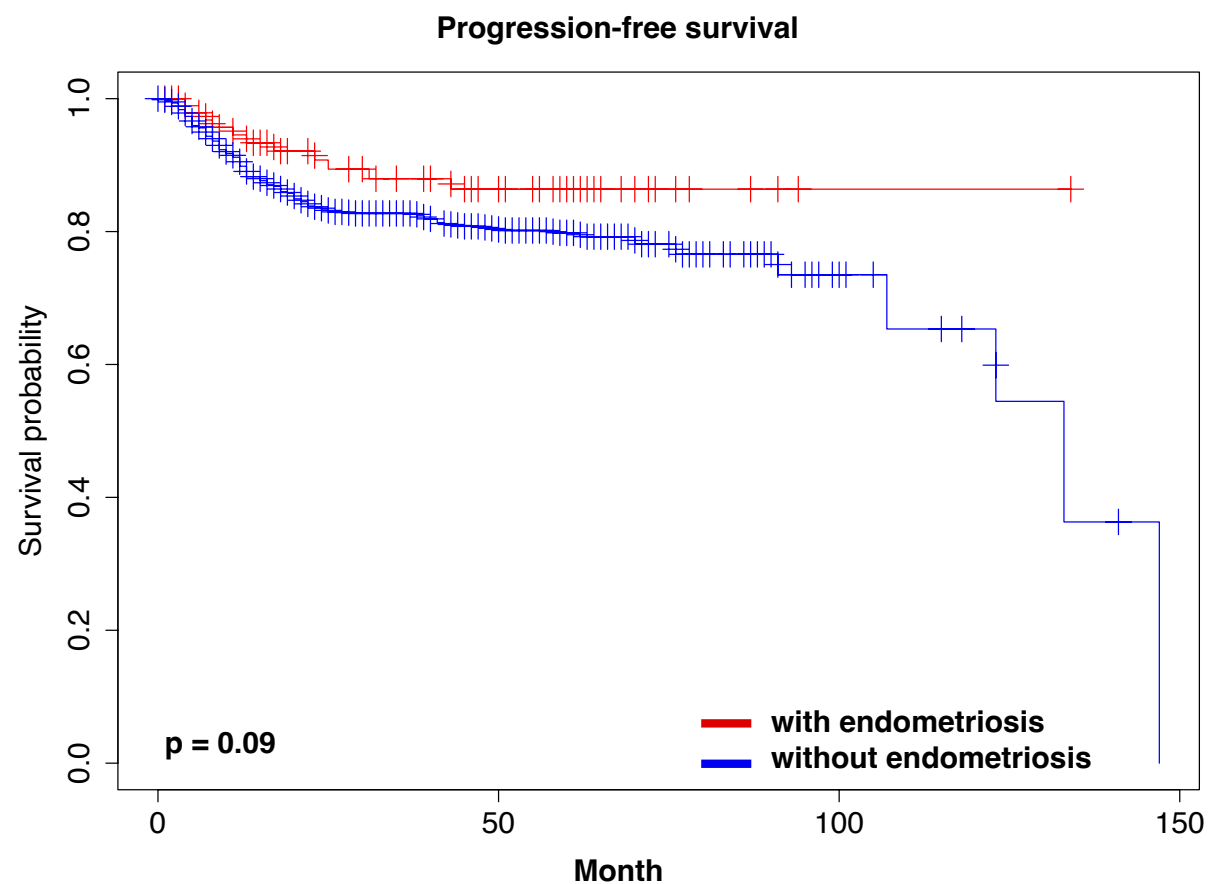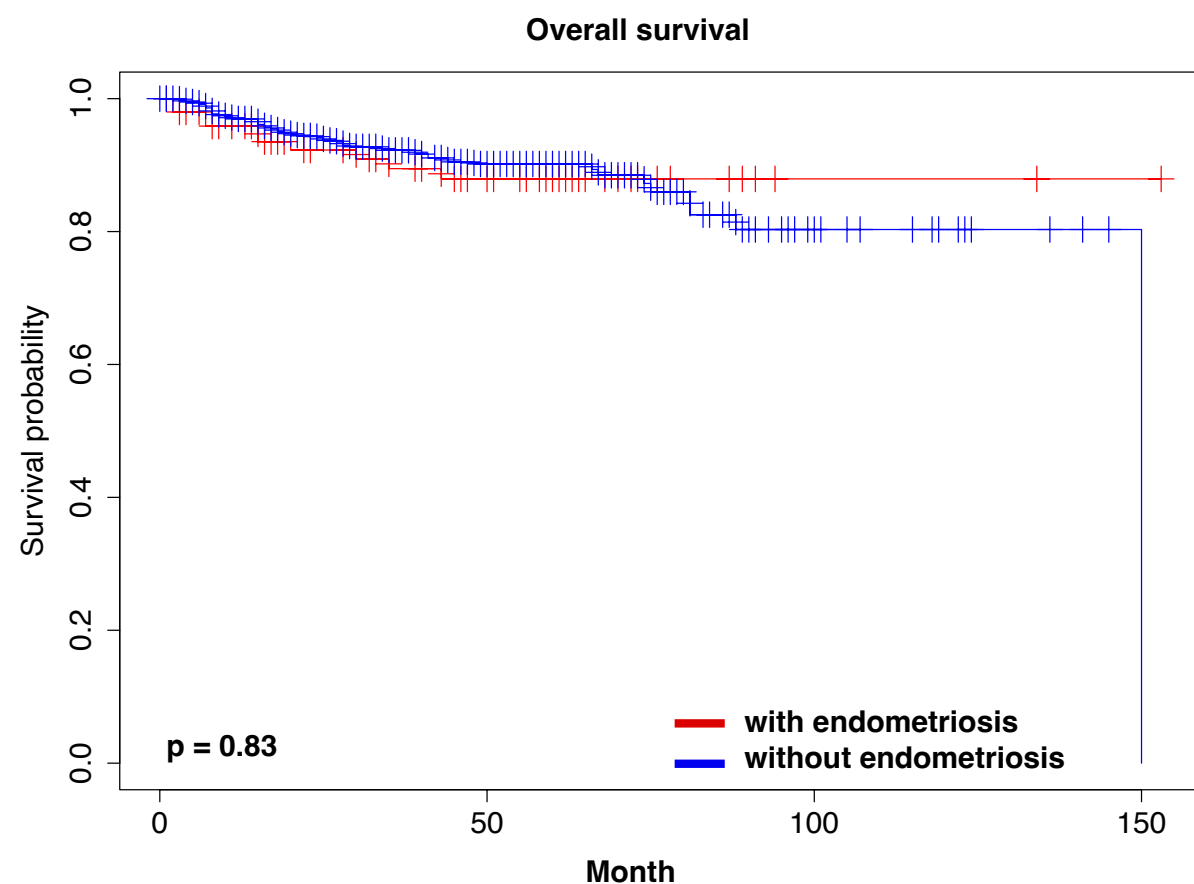

## Supplementary Figure 1.

Kaplan Meier curves representing the survival in relation of all stages with and without endometriosis

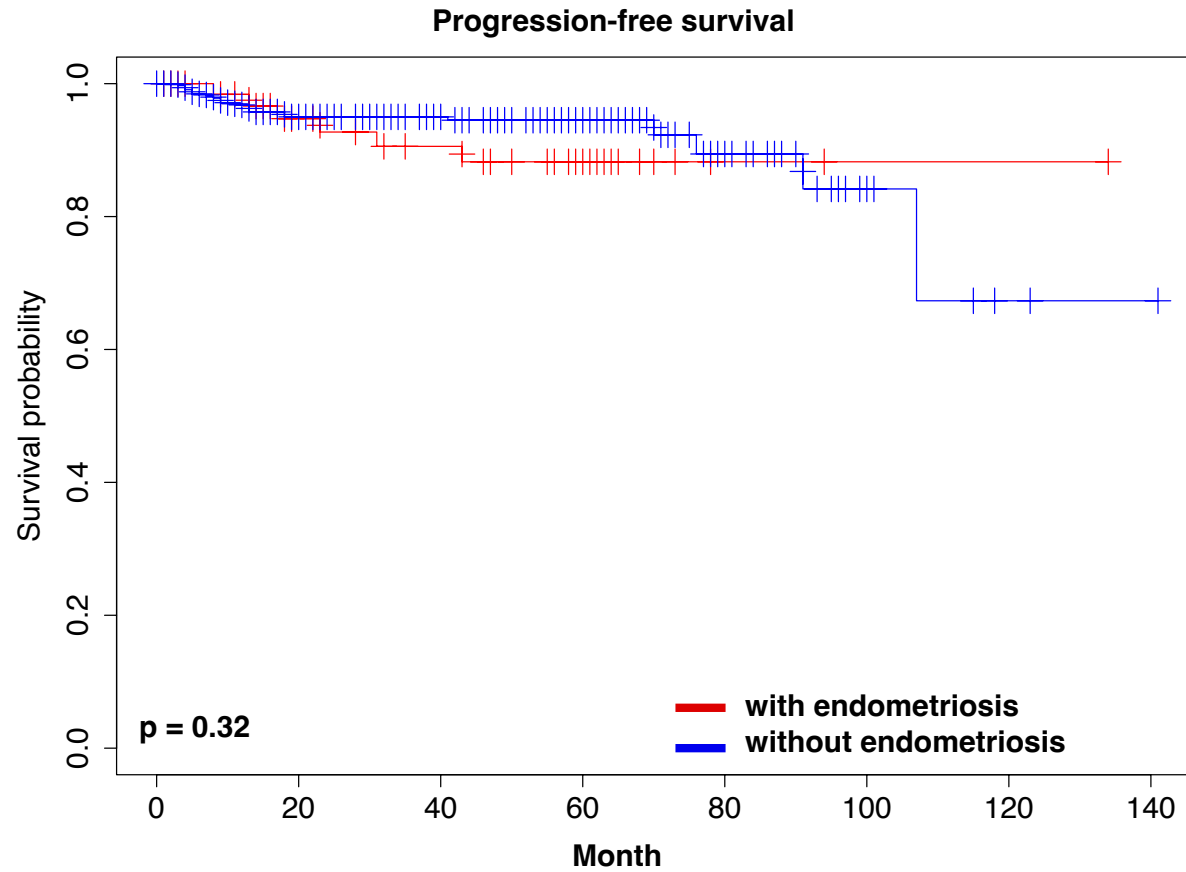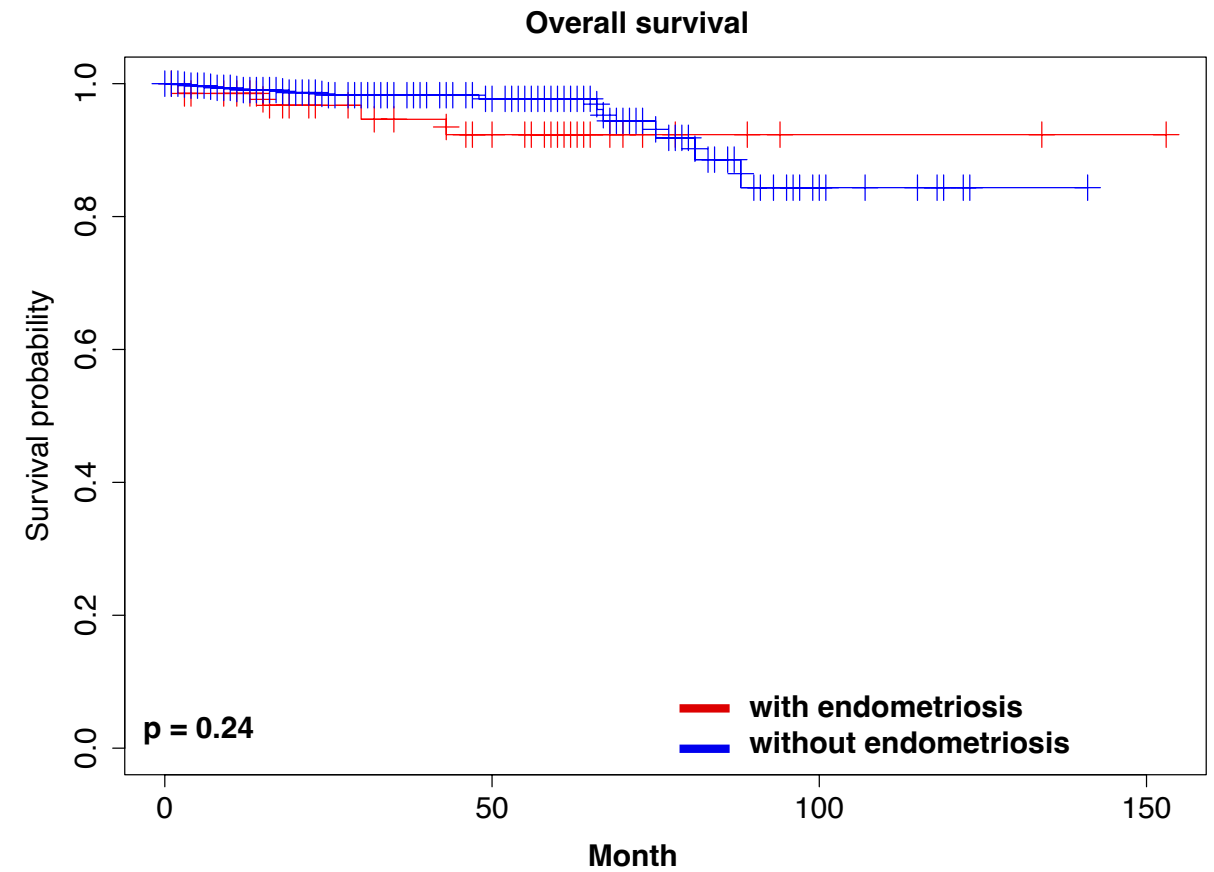

**Supplementary Figure 2.**

Kaplan Meier curves representing the survival in relation of stage IA with and without endometriosis
